# Supplementary material for: Neonatal Hyperglycemia Related to Parenteral Nutrition Affects Long-Term Neurodevelopment in Preterm Newborn: A Prospective Cohort Study
Source: MDPI journal article supplement (doi:10.3390/nu13061930), 2021-06-04
Supplement: s1 [file s1]

**Table S1.** Baseline clinical characteristics of the newborns in total parenteral nutrition in the first week of life.

|                                                        | <b>Total</b><br><i>n</i> = 147 | <b>Cohort A</b><br><i>n</i> = 68 | <b>Cohort B</b><br><i>n</i> = 79 | <b>OR (95% CI)</b>      | <b>p value</b><br>¶ |
|--------------------------------------------------------|--------------------------------|----------------------------------|----------------------------------|-------------------------|---------------------|
| <b>Maternal age, years old</b>                         | 34<br>(33 to 35)               | 34<br>(33 to 36)                 | 35<br>(33 to 36)                 | -                       | 0.460               |
| <b>Maternal age ≥ 35 years old, No. (%)</b>            | 61 (41.4)                      | 22 (32.4)                        | 39 (49.4)                        | 0.443<br>(0.222-0.887)  | <b>0.021</b>        |
| <b>Gestational age, weeks</b>                          | 28<br>(27 to 29)               | 28<br>(27 to 28)                 | 29<br>(29 to 30)                 | -                       | < <b>0.001</b>      |
| <b>Gestational age ≤ 29 weeks, No. (%)</b>             | 98 (66.7)                      | 53 (77.9)                        | 45 (57.0)                        | 0.375<br>(0.181-0.774)  | <b>0.007</b>        |
| <b>Birth weight, g</b>                                 | 1075<br>(1022 to 1128)         | 957<br>(878 to 1036)             | 1176<br>(1111 to 1241)           | -                       | < <b>0.001</b>      |
| <b>Birth weight ≤ 1000 grams, No. (%)</b>              | 64 (43.5)                      | 42 (61.8)                        | 22 (27.8)                        | 4.185<br>(2.092-8.375)  | < <b>0.001</b>      |
| <b>Male sex, No. (%)</b>                               | 83 (56.5)                      | 38 (55.9)                        | 45 (57.0)                        | 0.957<br>(0.498-1.840)  | 0.895               |
| <b>Cesarean section, No. (%)</b>                       | 128 (87.1)                     | 57 (83.8)                        | 71 (89.9)                        | 0.584<br>(0.220-1.548)  | 0.276               |
| <b>Antenatal corticosteroids <sup>a</sup>, No. (%)</b> | 96 (65.3)                      | 46 (67.6)                        | 50 (63.3)                        | 1.270<br>(0.637-2.532)  | 0.496               |
| <b>Intrauterine growth restriction, No (%)</b>         | 19 (12.9)                      | 9 (13.2)                         | 10 (12.7)                        | 1.071<br>(0.408-2.813)  | 0.890               |
| <b>Pregnancy-induced hypertension, No. (%)</b>         | 36 (24.5)                      | 18 (26.5)                        | 18 (22.8)                        | 1.245<br>(0.586-2.645)  | 0.569               |
| <b>Gestational diabetes, No. (%)</b>                   | 9 (6.1)                        | 3 (4.4)                          | 6 (7.6)                          | 0.570<br>(0.137-2.374)  | 0.336               |
| <b>Small for gestational age at birth, No. (%)</b>     | 34 (23.1)                      | 15 (22.1)                        | 19 (24.1)                        | 0.929<br>(0.429-2.012)  | 0.851               |
| <b>Twins, No. (%)</b>                                  | 40 (27.2)                      | 21 (30.9)                        | 19 (24.1)                        | 1.411<br>(0.681-2.924)  | 0.353               |
| <b>pH on cord blood</b>                                | 7.3<br>(7.2 to 7.3)            | 7.2<br>(7.2 to 7.3)              | 7.2<br>(7.2 to 7.3)              | -                       | 0.579               |
| <b>CRIB II score</b>                                   | 8<br>(7 to 9)                  | 9<br>(8 to 10)                   | 7<br>(6 to 8)                    | -                       | < <b>0.001</b>      |
| <b>Mechanical Ventilation, No. (%)</b>                 | 137 (93.2)                     | 67 (98.5)                        | 70 (88.6)                        | 8.614<br>(1.062-69.853) | <b>0.016</b>        |
| <b>Invasive mechanical ventilation, No. (%)</b>        | 71 (48.3)                      | 41 (60.3)                        | 30 (38.0)                        | 2.480<br>(1.275-4.824)  | <b>0.007</b>        |
| <b>Non-invasive mechanical ventilation, No. (%)</b>    | 132 (89.8)                     | 63 (92.6)                        | 69 (87.3)                        | 1.826<br>(0.592-5.633)  | 0.289               |
| <b>Patent Ductus Arteriosus, No. (%)</b>               | 59 (40.1)                      | 35 (51.5)                        | 24 (30.4)                        | 2.431<br>(1.237-4.775)  | <b>0.009</b>        |

**Figure Legend.** (a) Intramuscular steroid cycle in two doses of 12 mg over a 24-hour period; CRIB (Clinical risk index for babies). ¶ Cohort A vs Cohort B. Data were expressed as mean (95% CI), when not specified.

**Table S2.** Morbidity of the newborns in total parenteral nutrition in the first week of life.

|                                                  | <b>Total</b><br><i>n</i> = 147 | <b>Cohort A</b><br><i>n</i> = 68 | <b>Cohort B</b><br><i>n</i> = 79 | <b>OR (95% CI)</b>      | <b><i>p</i> value ¶</b> |
|--------------------------------------------------|--------------------------------|----------------------------------|----------------------------------|-------------------------|-------------------------|
| <b>Necrotizing enterocolitis</b>                 | 3 (2.0)                        | 3 (4.4)                          | 0 (0)                            | 0.451<br>(0.377-0.540)  | 0.097                   |
| <b>Intraventricular hemorrhage all stage</b>     | 18 (12.2)                      | 11 (16.2)                        | 7 (8.9)                          | 1.985<br>(0.723-5.446)  | 0.177                   |
| <b>Intraventricular hemorrhage stage &gt; II</b> | 11 (7.5)                       | 8 (11.8)                         | 3 (3.8)                          | 3.378<br>(0.859-13.285) | 0.067                   |
| <b>Periventricular leukomalacia</b>              | 4 (2.7)                        | 2 (2.9)                          | 2 (2.5)                          | 1.167<br>(0.160-8.512)  | 0.632                   |
| <b>Sepsis all diagnosis</b>                      | 19 (12.9)                      | 12 (17.6)                        | 7 (8.9)                          | 2.204<br>(0.815-5.964)  | 0.113                   |
| <b>Sepsis proven by positive culture</b>         | 17 (11.6)                      | 10 (14.7)                        | 7 (8.9)                          | 1.773<br>(0.636-4.947)  | 0.269                   |
| <b>Retinopathy of prematurity all stage</b>      | 44 (29.9)                      | 25 (36.8)                        | 19 (24.1)                        | 1.836<br>(0.899-3.748)  | 0.093                   |
| <b>Retinopathy of prematurity stage ≥ II</b>     | 34 (23.1)                      | 20 (29.4)                        | 14 (17.7)                        | 1.935<br>(0.888-4.213)  | 0.094                   |
| <b>Bronchopulmonary dysplasia</b>                | 16 (10.9)                      | 11 (16.2)                        | 5 (6.3)                          | 2.868<br>(0.942-8.728)  | 0.055                   |
| <b>Overall morbidity</b>                         | 50 (34.0)                      | 32 (47.1)                        | 18 (22.8)                        | 3.012<br>(1.482-6.123)  | <b>0.002</b>            |

**Notes.** ¶ Cohort A vs Cohort B. Data were expressed as No. (%).
