# Supplementary material for: Neonatal Hyperglycemia Related to Parenteral Nutrition Affects Long-Term Neurodevelopment in Preterm Newborn: A Prospective Cohort Study
Source: MDPI journal article supplement (doi:10.3390/nu13061930), 2021-06-04
Supplement: s1 [file s1]

*Parenteral Nutrition Intake  
of the first week of life*

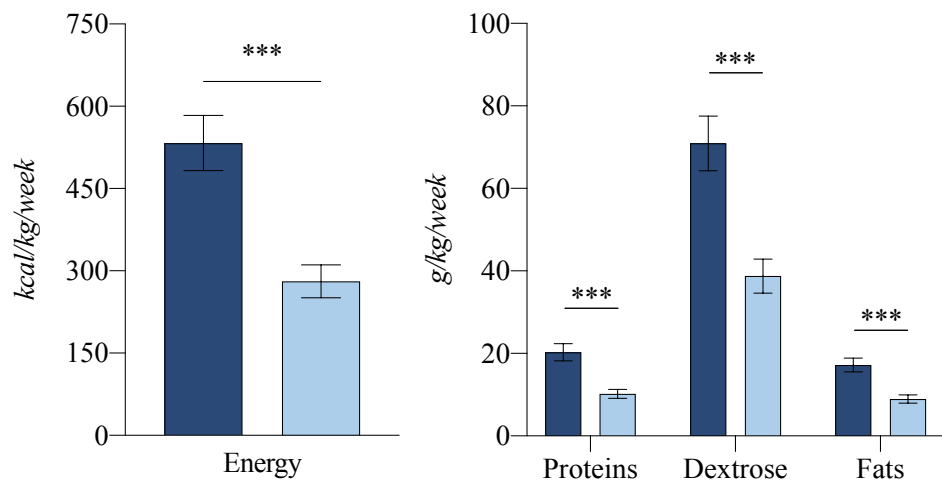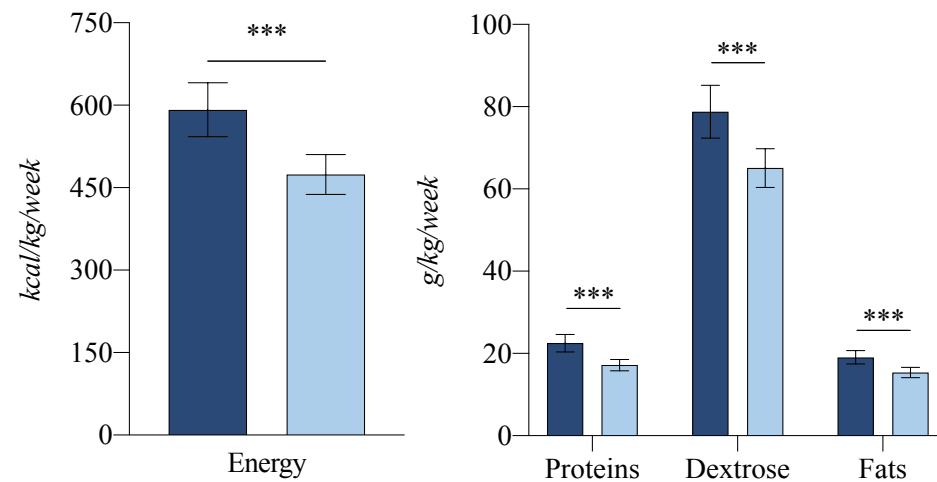

*Total Nutrition Intake  
of the first week of life*

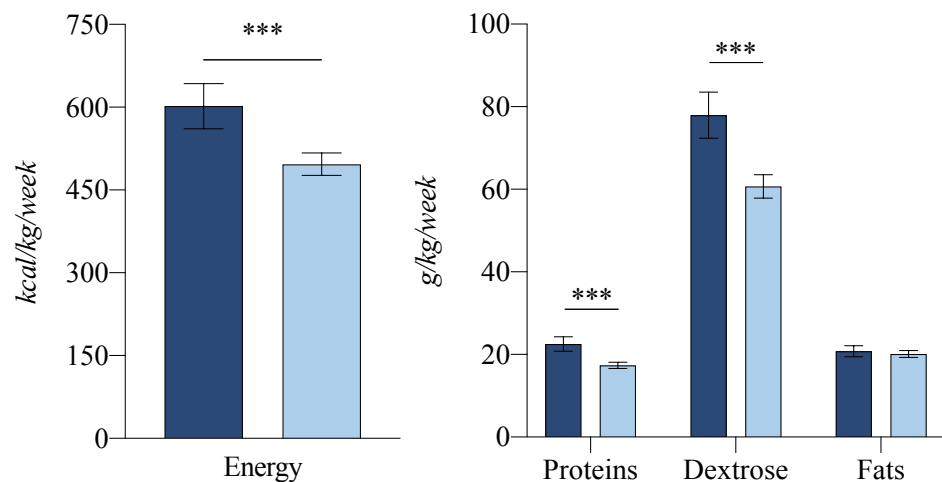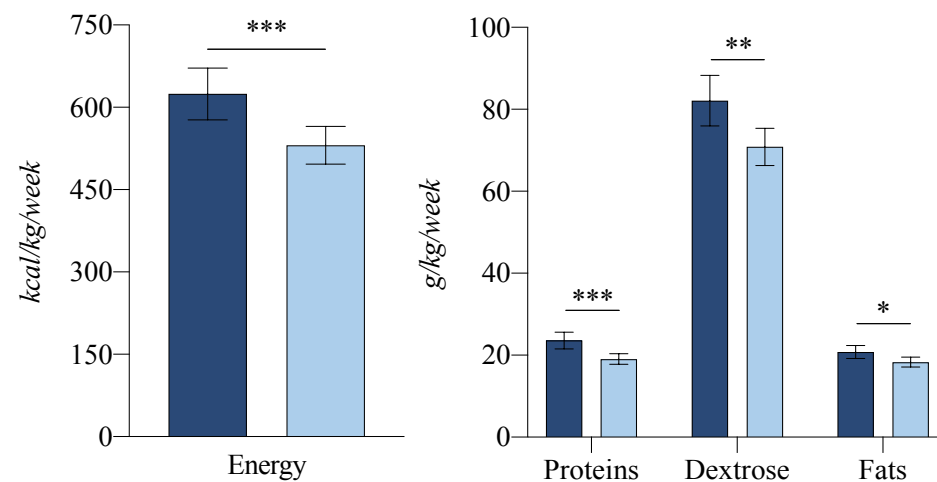

*All enrolled newborns*

*Newborns receiving total parenteral  
nutrition in the first week of life*

■ Cohort A (HG) ■ Cohort B (Control)
